# Supplementary material
Source: PubMed Central journal article supplement (PMC6535135)
Supplement: NIHMS1519897-supplement-3.pdf [file NIHMS1519897-supplement-3.pdf]

**Item S2.** ICD-9 codes used to define comorbidities

*Ischemic heart disease;*

410.x, 411.x, 412.x, 414.x, 427.5, 429.7, 785.51, V45.81, V45.82, 36.0x, 36.1x, 36.2x, 36.3x, 36.91

*Congestive Heart Failure;*

402.x, 404.x, 410.x, 425.x, 428.x

*Stroke;*

430, 431, 432.x, 433.x, 434.x, 99702

*Peripheral vascular disease*

*Amputation;*

84.91, 84.0x, 84.1x

*Peripheral Arterial Revascularization;*

39.25, 39.26, 39.29

*Liver disease*

070.2x, 070.3x, 070.44, 070.54, 456.x, 456.2x, 570, 571, 571.x, 571.4x, 571.5, 571.6, 571.8, 571.9, 572, 572.x, 573, 573.5, 571.0, 571.1, 573.0, 573.x, V42.7

*COPD*

490, 491, 491.x, 491.2x, 492, 492.x, 494.x, 495.x, 496, 500, 501, 502, 503, 504, 505, 506.4

*Diabetes mellitus*

250.0, 250.0x, 250.1, 250.1xm 250.2, 250.2x, 250.3, 250.3x, 250.4, 250.4x, 250.5, 250.5x, 250.6, 250.6x, 250.7, 250.7x, 250.8, 250.8x, 250.9, 250.9x, 250.93

**Reference**

Reese PP, Bloom RD, Feldman HI, et al. Mortality and cardiovascular disease among older live kidney donors. *Am J Transplant.* 2014;14(8):1853-1861.
