# Supplementary material
Source: PubMed Central journal article supplement (PMC6535135)
Supplement: NIHMS1519897-supplement-4.pdf [file NIHMS1519897-supplement-4.pdf]

**Table S1.** Univariate analysis of mortality risk on dialysis associated with HCV serostatus

|                                             | <b>HR</b> | <b>95% CI</b> | <b>P value</b> |
|---------------------------------------------|-----------|---------------|----------------|
| <b>HCV-seronegative</b>                     | Ref       | -             | -              |
| <b>HCV-seropositive</b>                     | 0.90      | 0.88-0.92     | <0.001         |
| <b>Age &lt;35 years</b>                     | Ref       | -             | -              |
| <b>35-45</b>                                | 1.45      | 1.39-1.51     | <0.001         |
| <b>45-55</b>                                | 2.12      | 2.05-2.19     | <0.001         |
| <b>55-65</b>                                | 3.05      | 2.94-3.15     | <0.001         |
| <b>65-75</b>                                | 4.42      | 4.28-4.57     | <0.001         |
| <b>&gt;75</b>                               | 7.03      | 6.81-7.26     | <0.001         |
| <b>Male</b>                                 | 0.98      | 0.97-0.99     | <0.001         |
| <b>Race</b>                                 |           |               |                |
| <b>Caucasian</b>                            | Ref       | -             | -              |
| <b>African American</b>                     | 0.54      | 0.53-0.54     | <0.001         |
| <b>Asian</b>                                | 0.52      | 0.51-0.54     | <0.001         |
| <b>Latino</b>                               | 0.48      | 0.47-0.49     | <0.001         |
| <b>Other</b>                                | 0.60      | 0.59-0.62     | <0.001         |
| <b>Cause of ESRD</b>                        |           |               |                |
| <b>DM</b>                                   | Ref       | -             | -              |
| <b>HTN</b>                                  | 0.84      | 0.83-0.85     | <0.001         |
| <b>GN</b>                                   | 0.64      | 0.63-0.65     | <0.001         |
| <b>PKD</b>                                  | 0.44      | 0.42-0.46     | <0.001         |
| <b>Other</b>                                | 1.02      | 1.00-1.03     | 0.025          |
| <b>Any preobservation dialysis</b>          | 1.13      | 1.12-1.16     | <0.001         |
| <b>Preobservation dialysis days</b>         | 0.99      | 0.99-0.99     | <0.001         |
| <b>CVD</b>                                  | 1.31      | 1.29-1.32     | <0.001         |
| <b>Diabetes mellitus</b>                    | 1.18      | 1.17-1.20     | <0.001         |
| <b>Liver disease</b>                        | 1.19      | 1.15-1.23     | <0.001         |
| <b>COPD</b>                                 | 1.75      | 1.71-1.79     | <0.001         |
| <b>BMI (kg/m<sup>2</sup>)</b>               | 0.98      | 0.98-0.99     | <0.001         |
| <b>Insurance</b>                            |           |               |                |
| <b>Medicare</b>                             | Ref       | -             | -              |
| <b>Medicaid</b>                             | 0.67      | 0.65-0.69     | <0.001         |
| <b>Private</b>                              | 0.75      | 0.74-0.76     | <0.001         |
| <b>Dialysis access (initial)</b>            |           |               |                |
| <b>AVF/AVG</b>                              | Ref       | -             | -              |
| <b>CVC</b>                                  | 1.42      | 1.40-1.44     | <0.001         |
| <b>Initial modality</b>                     |           |               |                |
| <b>HD</b>                                   | Ref       | -             | -              |
| <b>Home HD</b>                              | 0.66      | 0.61-0.73     | <0.001         |
| <b>Nocturnal</b>                            | 0.53      | 0.45-0.62     | <0.001         |
| <b>PD catheter</b>                          | 0.70      | 0.68-0.71     | <0.001         |
| <b>Median annual income quintile (US\$)</b> |           |               |                |
| <b>\$8,993-35,363</b>                       | Ref       | -             | -              |
| <b>\$35,370-43,265</b>                      | 1.11      | 1.10-1.13     | <0.001         |
| <b>\$43,331-52,143</b>                      | 1.15      | 1.13-1.16     | <0.001         |
| <b>\$52,173-67,316</b>                      | 1.10      | 1.08-1.11     | <0.001         |

|                                                  |      |           |        |
|--------------------------------------------------|------|-----------|--------|
| <b>\$67,331-180,120</b>                          | 1.09 | 1.07-1.10 | <0.001 |
| <b>FIB-4 Index</b>                               |      |           |        |
| <b>Low</b>                                       | Ref  | -         | -      |
| <b>Intermediate</b>                              | 1.81 | 1.78-1.83 | <0.001 |
| <b>High</b>                                      | 3.50 | 3.42-3.57 | <0.001 |
| <b>Albumin</b>                                   |      |           |        |
| <b>≥3.5</b>                                      | Ref  | -         | -      |
| <b>&lt;3.5</b>                                   | 1.65 | 1.63-1.66 | <0.001 |
| <b>Hemoglobin</b>                                |      |           |        |
| <b>≥12</b>                                       | Ref  | -         | -      |
| <b>10-12</b>                                     | 1.16 | 1.15-1.18 | <0.001 |
| <b>&lt;10</b>                                    | 1.15 | 1.13-1.16 | <0.001 |
| <b>Platelets x 10<sup>3</sup>/mm<sup>3</sup></b> |      |           |        |
| <b>≥150</b>                                      | Ref  | -         | -      |
| <b>&lt;150</b>                                   | 1.59 | 1.57-1.61 | <0.001 |

**Abbreviations:** HCV – Hepatitis C virus; ESRD - end-stage renal disease; DM – Diabetes mellitus; HTN – hypertension; GN – glomerulonephritis; PKD – polycystic kidney disease; CVD – cardiovascular disease; COPD – chronic obstructive pulmonary disease; BMI – body mass index; AVF – arteriovenous fistula; AVG – arteriovenous graft; CVC – central venous catheter; PD – peritoneal dialysis; FIB-4 – Fibrosis-4 Index
