# Supplementary material
Source: PubMed Central journal article supplement (PMC6535135)
Supplement: NIHMS1519897-supplement-5.pdf [file NIHMS1519897-supplement-5.pdf]

**Table S2.** Risk of mortality on dialysis associated with HCV serostatus in multivariable Cox regression (N=414,761)

|                                                       | <b>HR</b> | <b>95% CI</b> | <b>P value</b> |
|-------------------------------------------------------|-----------|---------------|----------------|
| <b>HCV-seronegative</b>                               | ref       |               |                |
| <b>HCV-seropositive</b>                               | 1.09      | 1.07-1.11     | <0.001         |
| <b>Age &lt;35 years</b>                               |           |               |                |
| <b>35-45</b>                                          | 1.37      | 1.32-1.42     | <0.001         |
| <b>45-55</b>                                          | 1.91      | 1.85-1.98     | <0.001         |
| <b>55-65</b>                                          | 2.68      | 2.59-2.77     | <0.001         |
| <b>65-75</b>                                          | 3.77      | 3.65-3.91     | <0.001         |
| <b>&gt;75</b>                                         | 5.69      | 5.50-5.89     | <0.001         |
| <b>Male</b>                                           | 1.03      | 1.01-1.03     | <0.001         |
| <b>Race</b>                                           |           |               |                |
| <b>Caucasian</b>                                      | ref       |               |                |
| <b>African American</b>                               | 0.65      | 0.65-0.66     | <0.001         |
| <b>Asian</b>                                          | 0.55      | 0.54-0.57     | <0.001         |
| <b>Latino</b>                                         | 0.56      | 0.56-0.58     | <0.001         |
| <b>Other</b>                                          | 0.67      | 0.66-0.69     | <0.001         |
| <b>Preobservation dialysis time</b>                   | 1.02      | 1.02-1.02     | <0.001         |
| <b>Hemodialysis</b>                                   | ref       |               |                |
| <b>Peritoneal dialysis</b>                            | 0.83      | 0.81-0.85     | <0.001         |
| <b>Medicare</b>                                       | ref       |               |                |
| <b>Medicaid</b>                                       | 1.16      | 1.14-1.20     | <0.001         |
| <b>Private</b>                                        | 0.92      | 0.91-0.93     | <0.001         |
| <b>Income quintile (US\$)</b>                         |           |               |                |
| <b>\$8,993-35,363</b>                                 | ref       |               |                |
| <b>\$35,370-43,265</b>                                | 1.00      | 0.99-1.02     | 0.236          |
| <b>\$43,331-52,143</b>                                | 1.01      | 0.99-1.02     | 0.200          |
| <b>\$52,173-67,316</b>                                | 0.94      | 0.93-0.95     | <0.001         |
| <b>\$67,331-180,120</b>                               | 0.91      | 0.89-0.92     | <0.001         |
| <b>CVD</b>                                            | 1.04      | 1.02-1.05     | <0.001         |
| <b>COPD</b>                                           | 1.24      | 1.21-1.27     | <0.001         |
| <b>Diabetes mellitus</b>                              | 1.11      | 1.09-1.12     | <0.001         |
| <b>Liver disease</b>                                  | 1.17      | 1.12-1.21     | <0.001         |
| <b>Albumin ≥3.5 (g/dL)</b>                            | ref       |               |                |
| <b>&lt;3.5</b>                                        | 1.62      | 1.61-1.64     | <0.001         |
| <b>Hemoglobin ≥12 (g/dL)</b>                          | ref       |               |                |
| <b>10-12</b>                                          | 1.05      | 1.04-1.06     | <0.001         |
| <b>&lt;10</b>                                         | 1.06      | 1.04-1.07     | <0.001         |
| <b>Platelets ≥150 x 10<sup>3</sup>/mm<sup>3</sup></b> | Ref       |               |                |
| <b>&lt;150</b>                                        | 1.40      | 1.38-1.42     | <0.001         |

**Abbreviations:** HR – Hazard ratio; CI – Confidence Interval; HCV – Hepatitis C virus; CVD – cardiovascular disease; COPD – chronic obstructive pulmonary disease; BMI – body mass index; AVF – arteriovenous fistula; AVG – arteriovenous graft; CVC – central venous catheter; PD – peritoneal dialysis; FIB-4 – Fibrosis-4 Index
