# Supplementary material
Source: PubMed Central journal article supplement (PMC6535135)
Supplement: NIHMS1519897-supplement-6.pdf [file NIHMS1519897-supplement-6.pdf]

**Table S3.** Risk of mortality on dialysis associated with HCV serostatus in multivariable Cox regression, with adjustment for FIB 4 index as an assessment of liver disease severity (N=174,387)

|                         | <b>HR</b> | <b>95% CI</b> | <b>P value</b> |
|-------------------------|-----------|---------------|----------------|
| <b>HCV-seronegative</b> | Ref       | -             | -              |
| <b>HCV-seropositive</b> | 1.09      | 1.06-1.13     | <0.001         |
| <b>FIB-4 Index</b>      |           |               |                |
| <b>Low</b>              | Ref       | -             | -              |
| <b>Intermediate</b>     | 1.20      | 1.18-1.23     | <0.001         |
| <b>High</b>             | 1.88      | 1.84-1.93     | <0.001         |

Model also adjusted for age, race, gender, pre-observation dialysis time, dialysis modality, primary insurance payer, median neighborhood income category, comorbidities of cardiovascular disease and diabetes and COPD, albumin categories, hemoglobin categories.

(Note: platelets and liver disease covariates are not in model, because platelets are in FIB-4 formula and FIB-4 is intended to categorize liver disease severity)
