# Supplementary material
Source: PubMed Central journal article supplement (PMC6535135)
Supplement: NIHMS1519897-supplement-8.pdf [file NIHMS1519897-supplement-8.pdf]

**Table S5.** Risk of mortality on dialysis associated with HCV serostatus in the subgroup of hemodialysis patients, with additional adjustment for body mass index; multivariable Cox regression (N=349,786)\*

|                         | <b>HR</b> | <b>95% CI</b> | <b>P value</b> |
|-------------------------|-----------|---------------|----------------|
| <b>HCV-seronegative</b> | Ref       |               |                |
| <b>HCV-seropositive</b> | 1.12      | 1.09-1.14     | <0.001         |

Model also adjusted for age, race, gender, pre-observation dialysis time, dialysis modality, primary insurance payer, median neighborhood income category, comorbidities of cardiovascular disease and diabetes and COPD and liver disease, body mass index category, albumin categories, hemoglobin categories, platelet categories

\* Results unchanged with additional adjustment for vascular access type (AVF/AVG vs CVC)
