# Supplementary material
Source: PubMed Central journal article supplement (PMC6535135)
Supplement: NIHMS1519897-supplement-9.pdf [file NIHMS1519897-supplement-9.pdf]

**Table S6.** Univariable model for placement on the kidney transplant waiting list.

|                                             | <b>HR</b> | <b>95% CI</b> | <b>P value</b> |
|---------------------------------------------|-----------|---------------|----------------|
| <b>HCV-seronegative</b>                     | Ref       | -             | -              |
| <b>HCV-seropositive</b>                     | 0.76      | 0.73-0.79     | <0.001         |
| <b>Age&lt;40 years</b>                      | Ref       | -             | -              |
| <b>40-70</b>                                | 0.49      | 0.48-0.50     | <0.001         |
| <b>&gt;70</b>                               | 0.06      | 0.05-0.06     | <0.001         |
| <b>Male</b>                                 | 1.40      | 1.37-1.42     | <0.001         |
| <b>Race</b>                                 |           |               |                |
| <b>Caucasian</b>                            | Ref       | -             | -              |
| <b>African American</b>                     | 1.06      | 1.04-1.08     | <0.001         |
| <b>Asian</b>                                | 1.53      | 1.46-1.59     | <0.001         |
| <b>Latino</b>                               | 1.10      | 1.07-1.13     | <0.001         |
| <b>Other</b>                                | 1.21      | 1.16-1.27     | <0.001         |
| <b>Cause of ESRD</b>                        |           |               |                |
| <b>DM</b>                                   | Ref       |               |                |
| <b>HTN</b>                                  | 1.09      | 1.06-1.11     | <0.001         |
| <b>GN</b>                                   | 2.07      | 2.03-2.13     | <0.001         |
| <b>PKD</b>                                  | 2.31      | 2.19-2.43     | <0.001         |
| <b>Other</b>                                | 1.18      | 1.14-1.21     | <0.001         |
| <b>Any preobservation dialysis</b>          | 0.74      | 0.72-0.76     | <0.001         |
| <b>Preobservation dialysis days</b>         | 0.99      | 0.99-0.99     | <0.001         |
| <b>CVD</b>                                  | 0.62      | 0.60-0.64     | <0.001         |
| <b>Diabetes mellitus</b>                    | 0.68      | 0.67-0.70     | <0.001         |
| <b>Liver disease</b>                        | 0.91      | 0.84-0.97     | 0.007          |
| <b>COPD</b>                                 | 0.29      | 0.26-0.32     | <0.001         |
| <b>BMI (kg/m<sup>2</sup>)</b>               | 0.99      | 0.99-0.99     | <0.001         |
| <b>Insurance</b>                            |           |               |                |
| <b>Medicare</b>                             | Ref       | -             | -              |
| <b>Medicaid</b>                             | 1.16      | 1.11-1.22     | <0.001         |
| <b>Private</b>                              | 1.99      | 1.96-2.03     | <0.001         |
| <b>Initial access type</b>                  |           |               |                |
| <b>AVF/AVG</b>                              | Ref       | -             | -              |
| <b>CVC</b>                                  | 1.08      | 1.06-1.10     | <0.001         |
| <b>Initial modality</b>                     |           |               |                |
| <b>HD</b>                                   | Ref       | -             | -              |
| <b>Home HD</b>                              | 1.83      | 1.61-2.09     | <0.001         |
| <b>Nocturnal</b>                            | 2.24      | 1.89-2.65     | <0.001         |
| <b>PD catheter</b>                          | 2.07      | 2.01-2.12     | <0.001         |
| <b>Median annual income quintile (US\$)</b> |           |               |                |
| <b>\$8,993-35,363</b>                       | Ref       | -             | -              |
| <b>\$35,370-43,265</b>                      | 1.04      | 1.01-1.07     | 0.004          |
| <b>\$43,331-52,143</b>                      | 1.14      | 1.11-1.17     | <0.001         |
| <b>\$52,173-67,316</b>                      | 1.27      | 1.23-1.30     | <0.001         |
| <b>\$67,331-180,120</b>                     | 1.35      | 1.31-1.39     | <0.001         |
| <b>FIB-4 Index</b>                          |           |               |                |

|                                                 |      |           |        |
|-------------------------------------------------|------|-----------|--------|
| <b>Low</b>                                      | Ref  | -         | -      |
| <b>Intermediate</b>                             | 0.41 | 0.40-0.43 | <0.001 |
| <b>High</b>                                     | 0.23 | 0.21-0.26 | <0.001 |
| <b>Albumin (g/dL)</b>                           |      |           |        |
| ≥3.5                                            | Ref  | -         | -      |
| <3.5                                            | 0.82 | 0.81-0.84 | <0.001 |
| <b>Hemoglobin (g/dL)</b>                        |      |           |        |
| ≥12                                             | Ref  | -         | -      |
| 10-12                                           | 1.08 | 1.06-1.11 | <0.001 |
| <10                                             | 1.34 | 1.31-1.38 | <0.001 |
| <b>Platelets x10<sup>3</sup>/mm<sup>3</sup></b> |      |           |        |
| ≥150                                            | Ref  | -         | -      |
| <150                                            | 0.68 | 0.66-0.70 | <0.001 |

**Abbreviations:** HR – Hazard ratio; CI – Confidence Interval; HCV – Hepatitis C virus; HCV – Hepatitis C virus; ESRD - end-stage renal disease; DM – Diabetes mellitus; HTN – hypertension; GN – glomerulonephritis; PKD – polycystic kidney disease; CVD – cardiovascular disease; COPD – chronic obstructive pulmonary disease; BMI – body mass index; AVF – arteriovenous fistula; AVG – arteriovenous graft; CVC – central venous catheter; PD – peritoneal dialysis; FIB-4 – Fibrosis-4 Index
