# Supplementary material
Source: PubMed Central journal article supplement (PMC6535135)
Supplement: NIHMS1519897-supplement-10.pdf [file NIHMS1519897-supplement-10.pdf]

**Table S7.** Multivariable Cox model for placement on the waiting list, including the FIB4 Index as a measure of liver disease severity. (N=220,174)

|                         | <b>HR</b> | <b>95% CI</b> | <b>P value</b> |
|-------------------------|-----------|---------------|----------------|
| <b>HCV-seronegative</b> | Ref       |               |                |
| <b>HCV-seropositive</b> | 0.66      | 0.59-0.74     | <0.001         |

Model also adjusted for age, race, gender, dialysis modality, primary insurance payer, median neighborhood income category, comorbidities of cardiovascular disease, diabetes and COPD, albumin categories, hemoglobin categories; model clustered on DSA
