# Supplementary material
Source: PubMed Central journal article supplement (PMC6535135)
Supplement: NIHMS1519897-supplement-11.pdf [file NIHMS1519897-supplement-11.pdf]

**Table S8.** Multivariable Cox model for placement on the waiting list, when a random 30% of the HCV-seropositive individuals in the cohort were reassigned as HCV negative; multivariable Cox regression (N=388,425)

|                         | <b>HR</b> | <b>95% CI</b> | <b>P value</b> |
|-------------------------|-----------|---------------|----------------|
| <b>HCV-seronegative</b> | Ref       |               |                |
| <b>HCV-seropositive</b> | 0.69      | 0.62-0.76     | <0.001         |

Model also adjusted for age, race, gender, dialysis modality, primary insurance payer, median neighborhood income category, comorbidities of cardiovascular disease, diabetes, COPD and liver disease, albumin categories, hemoglobin categories, platelet categories; model clustered on DSA
