# Supplementary material
Source: PubMed Central journal article supplement (PMC6535135)
Supplement: NIHMS1519897-supplement-12.pdf [file NIHMS1519897-supplement-12.pdf]

**Tables S9.** Multivariable Cox model for placement on the waiting list, adjusted for geographical variation in waiting time for kidney transplantation, first clustering on donor service area and then not clustering on donor service area (N=388,425)

a. Analysis with DSA clustering

|                         | <b>HR</b> | <b>95% CI</b> | <b>P value</b> |
|-------------------------|-----------|---------------|----------------|
| <b>HCV-seronegative</b> | Ref       |               |                |
| <b>HCV-seropositive</b> | 0.67      | 0.62-0.74     | <0.001         |

Model also adjusted for age, race, gender, dialysis modality, primary insurance payer, median neighborhood income category, comorbidities of cardiovascular disease, diabetes, COPD and liver disease, albumin categories, hemoglobin categories, platelet categories, geographic tertile of waiting time for transplantation; model clustered on DSA

b. Analysis without DSA clustering

|                         | <b>HR</b> | <b>95% CI</b> | <b>P value</b> |
|-------------------------|-----------|---------------|----------------|
| <b>HCV-seronegative</b> | Ref       |               |                |
| <b>HCV-seropositive</b> | 0.67      | 0.65-0.70     | <0.001         |

Model also adjusted for age, race, gender, dialysis modality, primary insurance payer, median neighborhood income category, comorbidities of cardiovascular disease, diabetes, COPD and liver disease, albumin categories, hemoglobin categories, platelet categories, geographic tertile of waiting time for transplantation
