# Supplementary material
Source: PubMed Central journal article supplement (PMC6535135)
Supplement: NIHMS1519897-supplement-13.pdf [file NIHMS1519897-supplement-13.pdf]

**Table S10.** Univariable analysis of the outcome of kidney transplantation after joining the waiting list.

|                                   | <b>HR</b> | <b>95% CI</b> | <b>P value</b> |
|-----------------------------------|-----------|---------------|----------------|
| <b>HCV-</b>                       | Ref       | -             | -              |
| <b>HCV+</b>                       | 1.03      | 0.96-1.09     | 0.399          |
| <b>Age ≤40</b>                    | Ref       | -             | -              |
| <b>&gt;40</b>                     | 0.82      | 0.79-0.84     | <0.001         |
| <b>Male</b>                       | 1.08      | 1.04-1.11     | <0.001         |
| <b>Race</b>                       |           |               |                |
| <b>Caucasian</b>                  | Ref       | -             | -              |
| <b>African American</b>           | 0.61      | 0.59-0.63     | <0.001         |
| <b>Latino</b>                     | 0.63      | 0.61-0.66     | <0.001         |
| <b>Asian</b>                      | 0.55      | 0.51-0.59     | <0.001         |
| <b>Other</b>                      | 0.61      | 0.54-0.68     | <0.001         |
| <b>Cause of ESRD</b>              |           |               |                |
| <b>DM</b>                         | Ref       |               |                |
| <b>HTN</b>                        | 1.12      | 1.08-1.17     | <0.001         |
| <b>GN</b>                         | 1.49      | 1.43-1.55     | <0.001         |
| <b>PKD</b>                        | 1.40      | 1.28-1.52     | <0.001         |
| <b>Other</b>                      | 1.32      | 1.25-1.39     | <0.001         |
| <b>Pre-waitlist dialysis days</b> | 1.00      | 1.00-1.00     | <0.001         |
| <b>CVD</b>                        | 0.91      | 0.87-0.96     | <0.001         |
| <b>Diabetes mellitus</b>          | 0.73      | 0.70-0.75     | <0.001         |
| <b>Liver disease</b>              | 0.97      | 0.85-1.10     | 0.607          |
| <b>COPD</b>                       | 0.89      | 0.74-1.09     | 0.266          |
| <b>BMI (g/m<sup>2</sup>)</b>      |           |               |                |
| <b>18.5-30</b>                    | Ref       | -             | -              |
| <b>&lt;18.5</b>                   | 1.11      | 1.00-1.23     | 0.045          |
| <b>30-40</b>                      | 0.84      | 0.81-0.86     | <0.001         |
| <b>&gt;40</b>                     | 0.52      | 0.47-0.58     | <0.001         |
| <b>Insurance</b>                  |           |               |                |
| <b>Medicare</b>                   | Ref       | -             | -              |
| <b>Medicaid</b>                   | 1.02      | 0.95-1.11     | 0.521          |
| <b>Private</b>                    | 1.15      | 1.11-1.18     | <0.001         |
| <b>Dialysis access (initial)</b>  |           |               |                |
| <b>AVF/AVG</b>                    | Ref       | -             | -              |
| <b>CVC</b>                        | 1.11      | 1.07-1.14     | <0.001         |
| <b>Hemodialysis</b>               | Ref       | -             | -              |
| <b>Home Hemodialysis</b>          | 1.16      | 0.93-1.46     | 0.183          |
| <b>Nocturnal</b>                  | 0.91      | 0.67-1.25     | 0.577          |
| <b>Peritoneal dialysis</b>        | 1.18      | 1.12-1.23     | <0.001         |
| <b>FIB-4 Index</b>                |           |               |                |
| <b>Low</b>                        | Ref       | -             | -              |
| <b>Intermediate</b>               | 1.01      | 0.94-1.07     | 0.851          |
| <b>High</b>                       | 1.09      | 0.89-1.34     | 0.413          |
| <b>Albumin (g/dL)</b>             |           |               |                |

|                                                  |      |           |        |
|--------------------------------------------------|------|-----------|--------|
| <b>≥3.5</b>                                      | Ref  | -         | -      |
| <b>&lt;3.5</b>                                   | 0.81 | 0.77-0.86 | <0.001 |
| <b>Hemoglobin (g/dL)</b>                         |      |           |        |
| <b>≥12</b>                                       | Ref  | -         | -      |
| <b>10-12</b>                                     | 0.87 | 0.82-0.92 | <0.001 |
| <b>&lt;10</b>                                    | 0.92 | 0.88-0.95 | <0.001 |
| <b>Platelets x 10<sup>3</sup>/mm<sup>3</sup></b> |      |           |        |
| <b>≥150</b>                                      | Ref  | -         | -      |
| <b>&lt;150</b>                                   | 1.05 | 0.99-1.11 | 0.093  |
| <b>Income quintile (US\$)</b>                    |      |           |        |
| <b>\$8,993-35,363</b>                            | Ref  | -         | -      |
| <b>\$35,370-43,265</b>                           | 1.06 | 1.01-1.12 | 0.010  |
| <b>\$43,331-52,143</b>                           | 1.01 | 0.96-1.06 | 0.633  |
| <b>\$52,173-67,316</b>                           | 0.98 | 0.93-1.02 | 0.365  |
| <b>\$67,331-180,120</b>                          | 0.97 | 0.92-1.01 | 0.162  |
| <b>PRA&gt;80%</b>                                | 0.72 | 0.68-0.76 | <0.001 |
| <b>Blood group</b>                               |      |           |        |
| <b>O</b>                                         | Ref  | -         | -      |
| <b>A</b>                                         | 1.69 | 1.64-1.76 | <0.001 |
| <b>B</b>                                         | 0.99 | 0.95-1.04 | 0.812  |
| <b>AB</b>                                        | 2.43 | 2.27-2.60 | <0.001 |

**Abbreviations:** HR – Hazard ratio; CI – Confidence Interval; HCV – Hepatitis C virus; ESRD - end-stage renal disease; DM – Diabetes mellitus; HTN – hypertension; GN – glomerulonephritis; PKD – polycystic kidney disease; CVD – cardiovascular disease; COPD – chronic obstructive pulmonary disease; BMI – body mass index; CVD – cardiovascular disease; COPD – chronic obstructive pulmonary disease; AVF – arteriovenous fistula; AVG – arteriovenous graft; CVC – central venous catheter; PD – peritoneal dialysis; FIB-4 – Fibrosis-4 Index; PRA – panel reactive antibody;
