# Supplementary material
Source: PubMed Central journal article supplement (PMC6535135)
Supplement: NIHMS1519897-supplement-14.pdf [file NIHMS1519897-supplement-14.pdf]

**Table S11.** Multivariable Cox model for transplantation, including FIB-4 index as a measure of liver disease severity, (N=23,212)

|                         | <b>HR</b> | <b>95% CI</b> | <b>P value</b> |
|-------------------------|-----------|---------------|----------------|
| <b>HCV-seronegative</b> | Ref       |               |                |
| <b>HCV-seropositive</b> | 1.16      | 0.97-1.39     | 0.087          |

Model also adjusted for age, race, gender, BMI, primary insurance payer, median neighborhood income category, PRA, blood group, pre-waitlist dialysis days, comorbidities of cardiovascular disease, diabetes, and liver disease, albumin categories, hemoglobin categories, clustered on DSA
