# Supplementary material
Source: PubMed Central journal article supplement (PMC6535135)
Supplement: NIHMS1519897-supplement-18.pdf [file NIHMS1519897-supplement-18.pdf]

**Table S15.** Among HCV-seropositive transplant candidates: Survival benefit associated with kidney transplantation from either an HCV-seropositive or HCV-seronegative donor by three years after transplantation, compared to remaining on the waiting list, (N=2287)

|                               | <b>HR</b> | <b>95% CI</b> | <b>P value</b> |
|-------------------------------|-----------|---------------|----------------|
| <b>Waitlist</b>               | Ref       |               |                |
| <b>HCV-seronegative donor</b> | 0.17      | 0.07-0.42     | <0.001         |
| <b>HCV-seropositive donor</b> | 0.83      | 0.50-1.40     | 0.502          |

Model also adjusted for age, race, gender, BMI, dialysis modality, primary insurance payer, median neighborhood income category, PRA, pre-waitlist dialysis days, prior kidney transplant, comorbidities of cardiovascular disease, diabetes, and liver disease, albumin categories, hemoglobin categories, platelet categories; year of wait listing interaction with time
