# Supplementary material
Source: PubMed Central journal article supplement (PMC6535135)
Supplement: NIHMS1519897-supplement-19.pdf [file NIHMS1519897-supplement-19.pdf]

**Table S16.** Among HCV-seropositive transplant candidates: Survival benefit associated with kidney transplantation from a HCV-seropositive donor, compared to remaining on the waiting list or accepting a HCV- donor, (N=2287)

|                                        | <b>HR</b> | <b>95% CI</b> | <b>P value</b> |
|----------------------------------------|-----------|---------------|----------------|
| <b>Waitlist/HCV-seronegative donor</b> | Ref       |               |                |
| <b>HCV-seropositive donor</b>          | 1.12      | 0.67-1.88     | 0.652          |

Model also adjusted for age, race, gender, BMI, dialysis modality, primary insurance payer, median neighborhood income category, PRA, pre-waitlist dialysis days, prior kidney transplant, comorbidities of cardiovascular disease, diabetes, and liver disease, albumin categories, hemoglobin categories, platelet categories; year of wait listing interaction with time
