# Supplementary material
Source: PubMed Central journal article supplement (PMC6535135)
Supplement: NIHMS1519897-supplement-20.pdf [file NIHMS1519897-supplement-20.pdf]

**Table S17.** Risk of mortality on dialysis associated with HCV serostatus in multivariable Cox regression, using multiple imputation for missing data, (N=442,171)

|                         | <b>HR</b> | <b>95% CI</b> | <b>P value</b> |
|-------------------------|-----------|---------------|----------------|
| <b>HCV-seronegative</b> | Ref       |               |                |
| <b>HCV-seropositive</b> | 1.09      | 1.07-1.11     | <0.001         |

Model also adjusted for age, race, gender, pre-observation dialysis time, dialysis modality, primary insurance payer, median neighborhood income category, comorbidities of cardiovascular disease, diabetes, COPD and liver disease, albumin categories, hemoglobin categories, platelet categories
