# Supplementary material
Source: PubMed Central journal article supplement (PMC6535135)
Supplement: NIHMS1519897-supplement-21.pdf [file NIHMS1519897-supplement-21.pdf]

**Table S18.** Multivariable Cox model for placement on the waiting list, using multiple imputation for missing data, (N=410,796\*)

|                         | <b>HR</b> | <b>95% CI</b> | <b>P value</b> |
|-------------------------|-----------|---------------|----------------|
| <b>HCV-seronegative</b> | Ref       |               |                |
| <b>HCV-seropositive</b> | 0.68      | 0.62-0.74     | <0.001         |

Model also adjusted for age, race, gender, dialysis modality, primary insurance payer, median neighborhood income category, comorbidities of cardiovascular disease, diabetes, COPD and liver disease, albumin categories, hemoglobin categories, platelet categories; model clustered on DSA

\* Stata software was not able to impute on DSA, as it was missing in only 8 patients
