# Supplementary material
Source: PubMed Central journal article supplement (PMC6535135)

Figure S1. Flow chart for process of assembling cohort

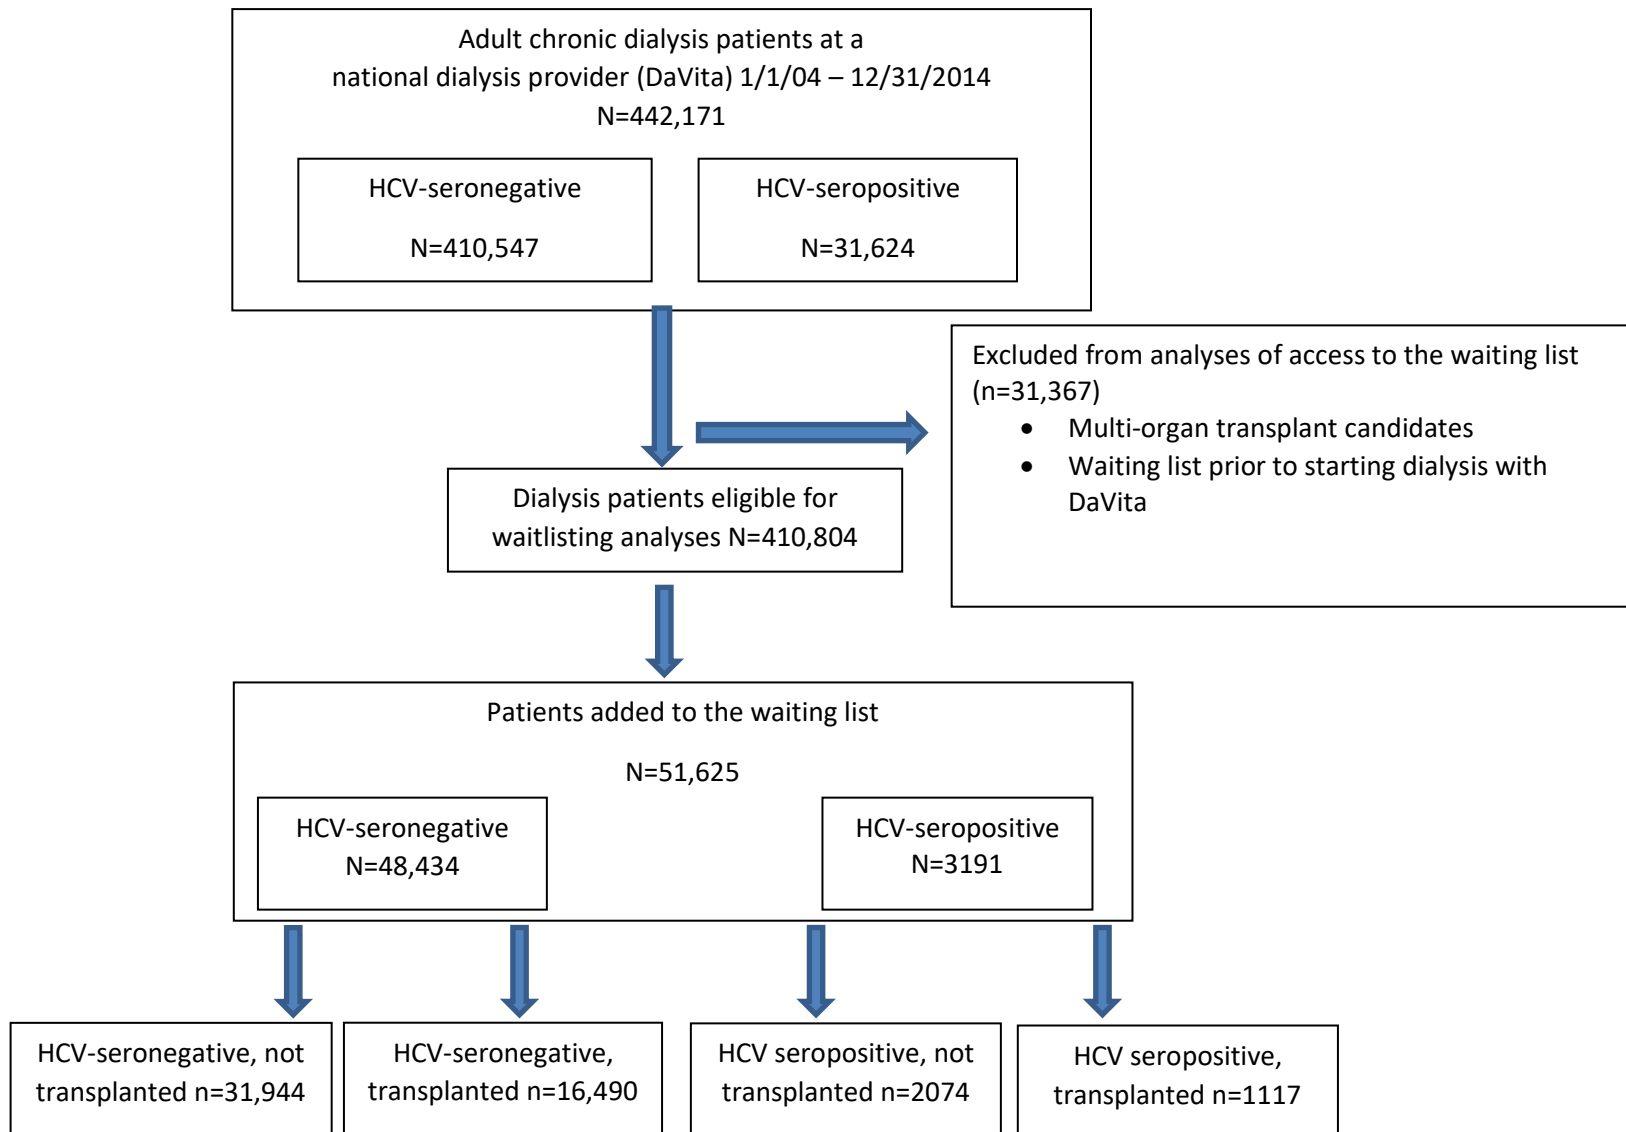

Supplement: NIHMS1519897-supplement-1.pdf [file NIHMS1519897-supplement-1.pdf]
